# Supplementary material for: Case report: rapid and durable response to PDGFR targeted therapy in a child with refractory multiple infantile myofibromatosis and a heterozygous germline mutation of the PDGFRB gene
Source: Springer Nature journal article supplement (doi:10.1186/s12885-017-3115-x), 2017-02-10

 Methotrexate/vinblastine according to EpSSG 2005, reduction of doses because of high toxicity

 5 cycles of vincristine/actinomycine/cyclophosphamide and vinblastine/actinomycine/cyclophosphamide, partial response, but also severe adverse events were observed

 Sunitinib and subnitinib/vinblastine — the longest EFS from the start of treatment

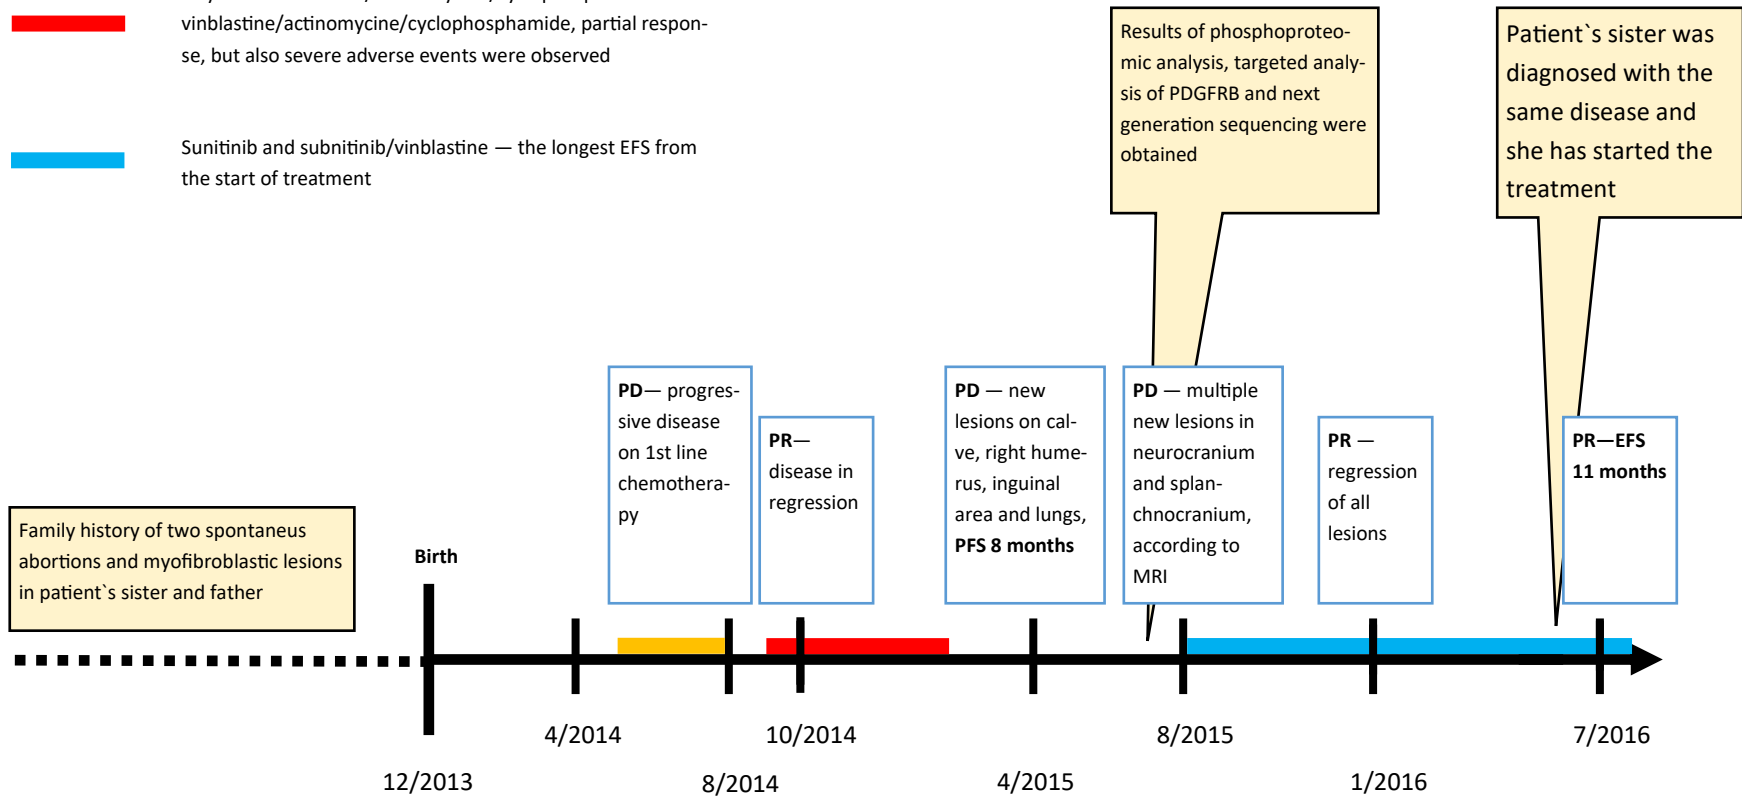

Supplement: MOESM1 [file 12058848]
